# Supplementary material for: In search of cues: dung beetle attraction and the significance of volatile composition of dung
Source: Springer Nature journal article supplement (doi:10.1007/s00049-018-0266-4), 2018-10-01

**Supplementary Material 2: Mass spectra of tentatively assigned or unknown compounds in gas chromatographic analyses of fresh dung samples. Sequence of listed spectra is equal to table S3.**

methyl-butric acid

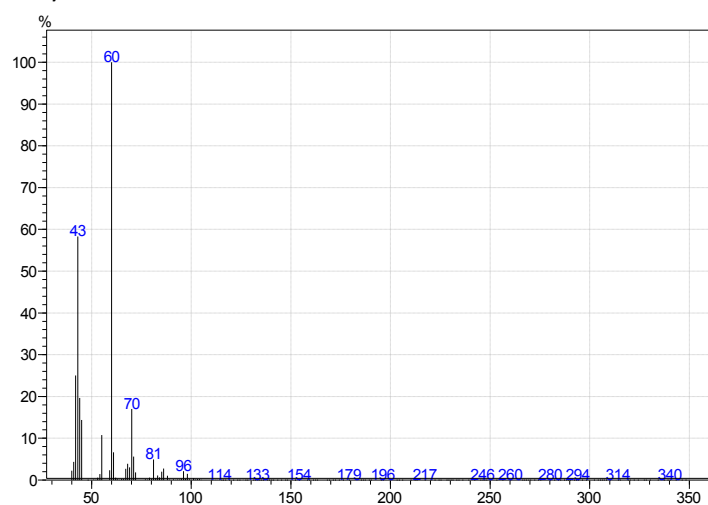

unknown 1

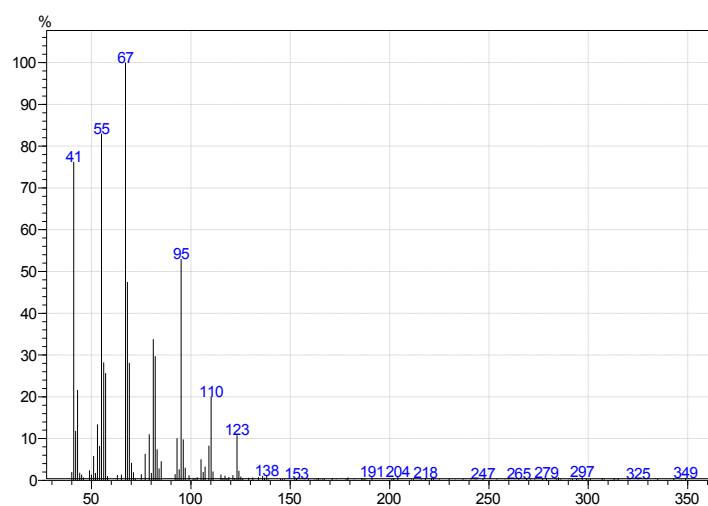

methyl-heptane

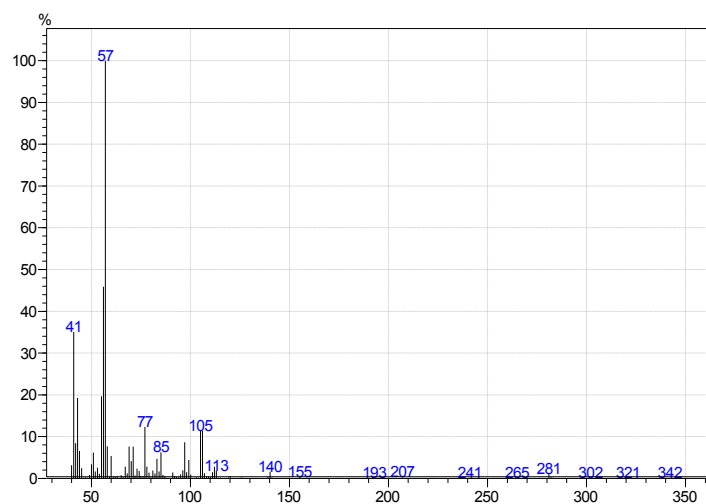

unknown 2

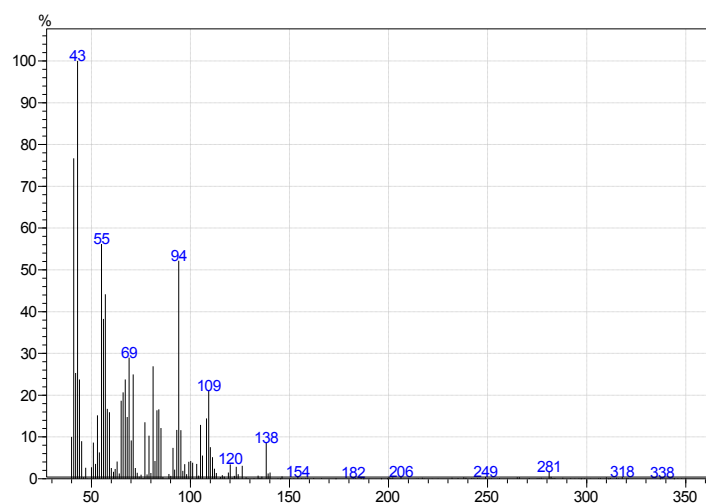

cyclohexanemethanol

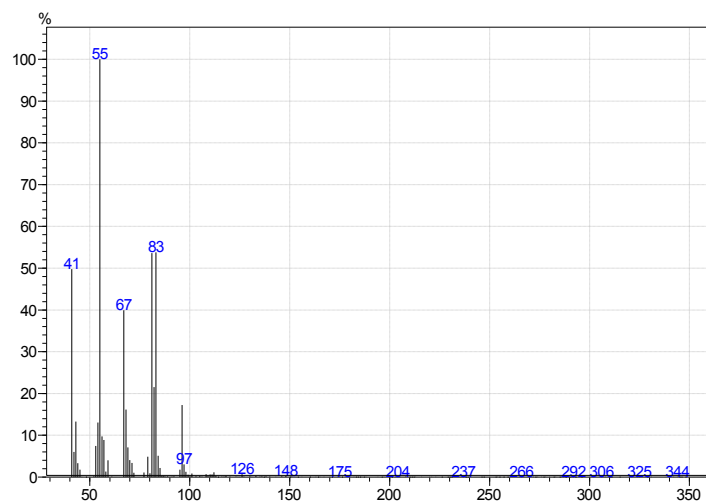

unknown 3

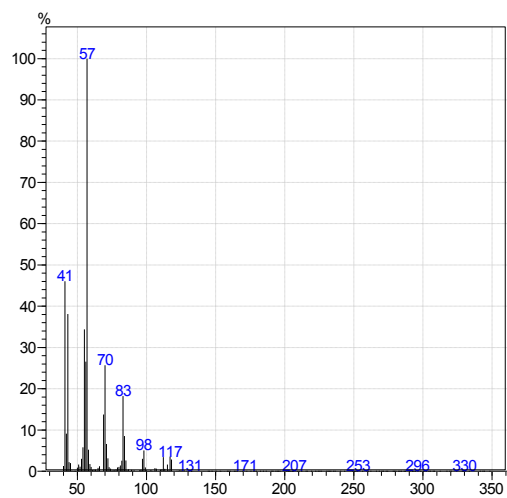

monoterpene 1

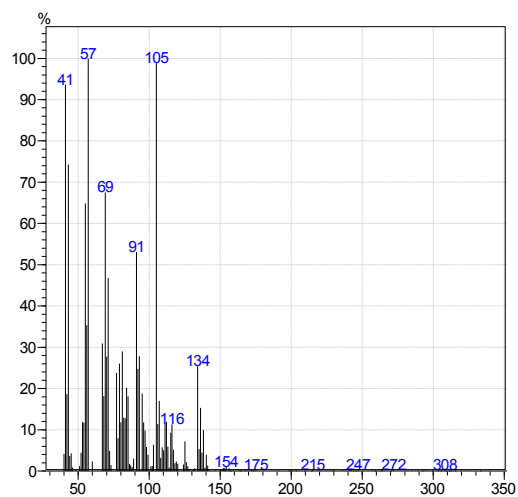

methyl cyclohexanoate

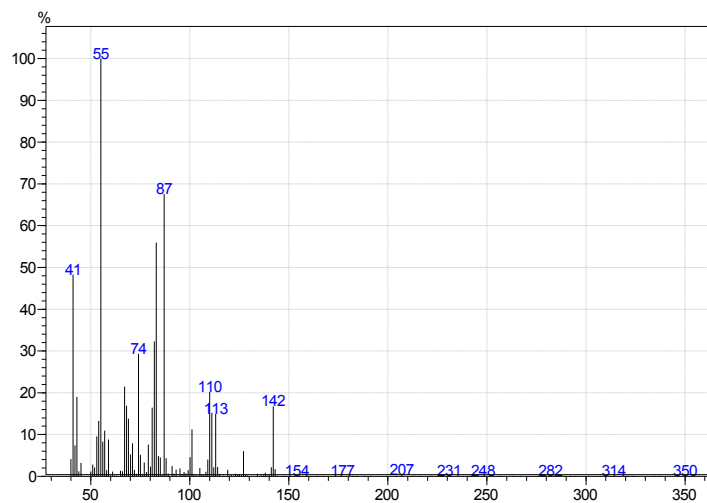

unknown 4

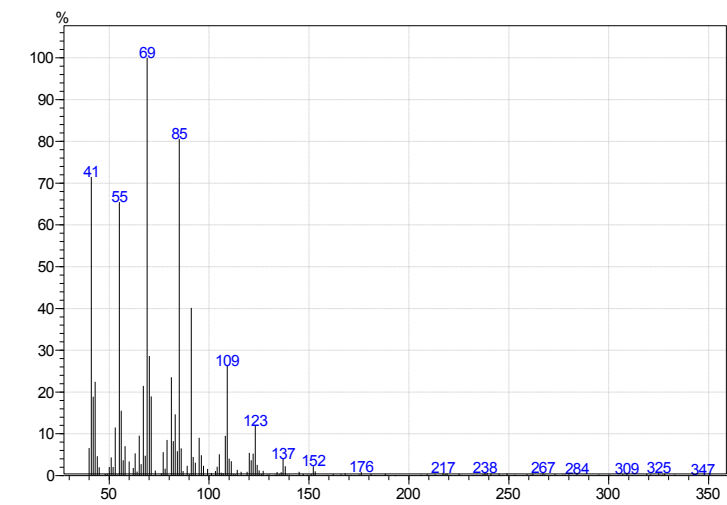

monoterpene 2

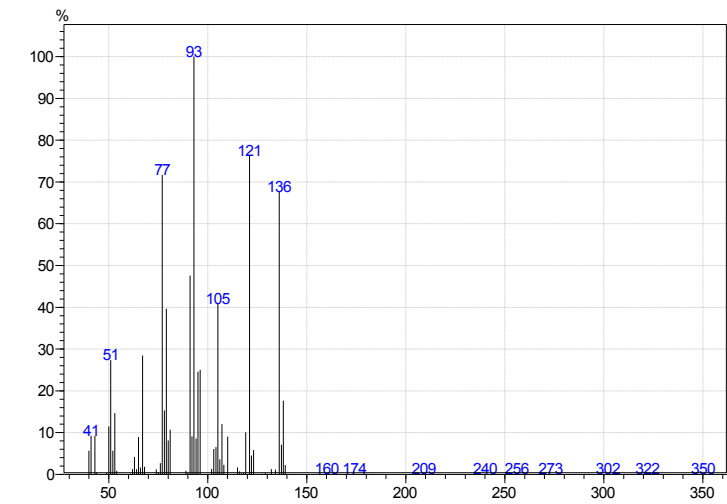

unknown 5

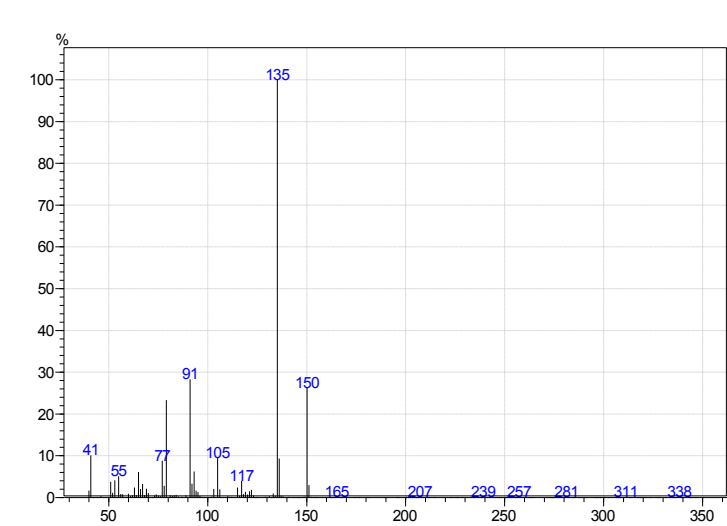

unknown 6

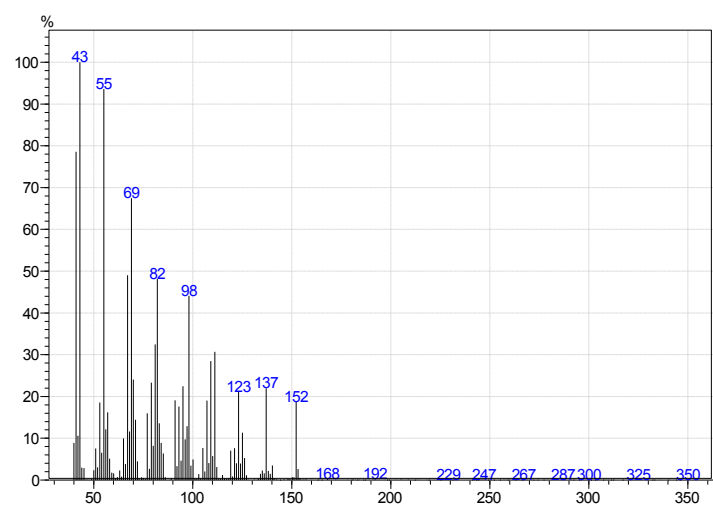

unknown 7

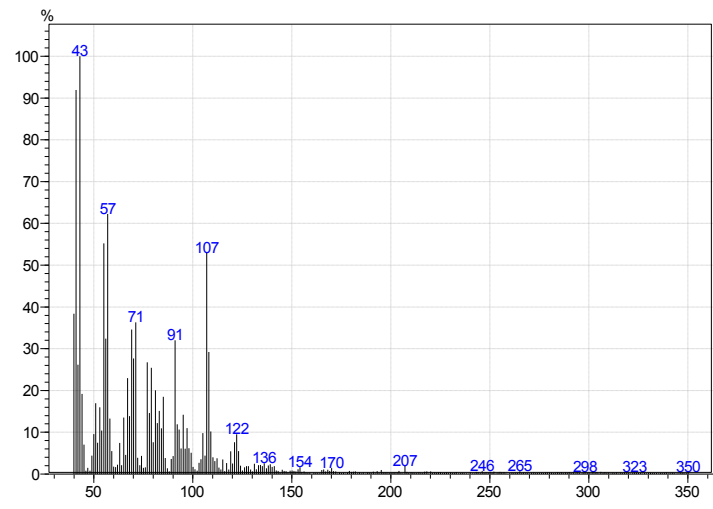

tetrahydroquinoline

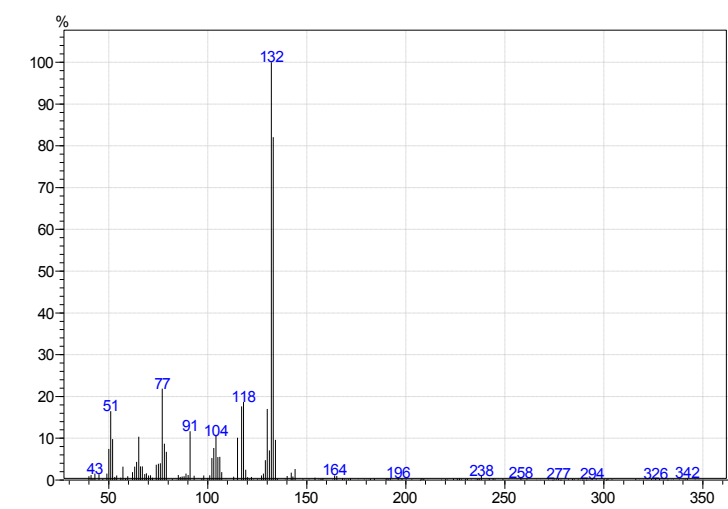

unknown 8

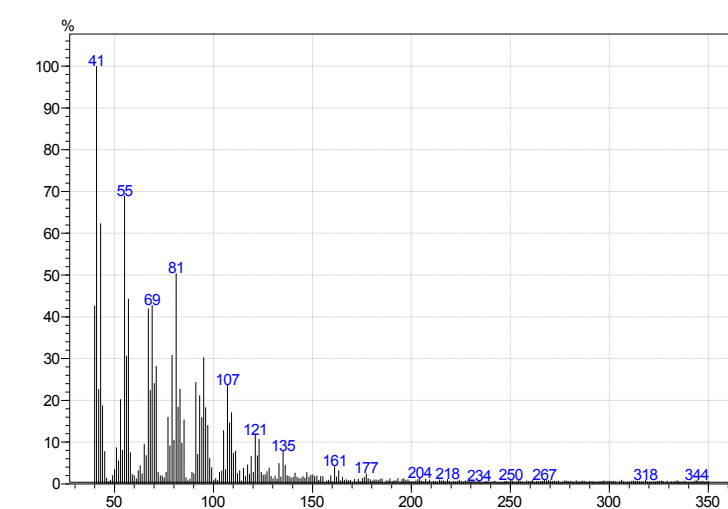

sesquiterpene 1

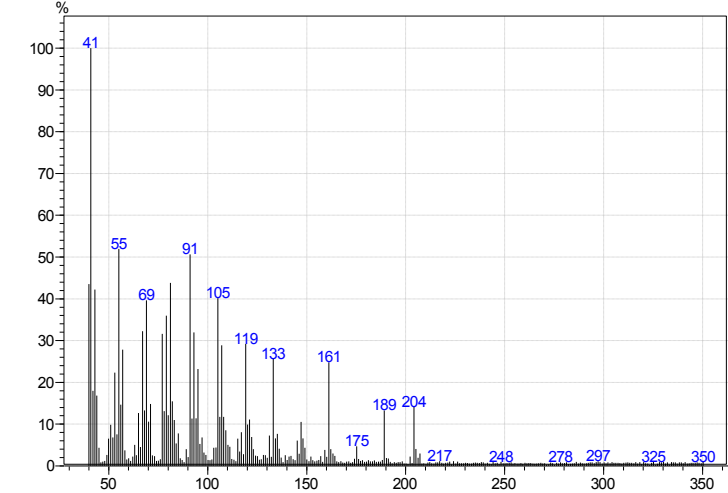

sesquiterpene 2

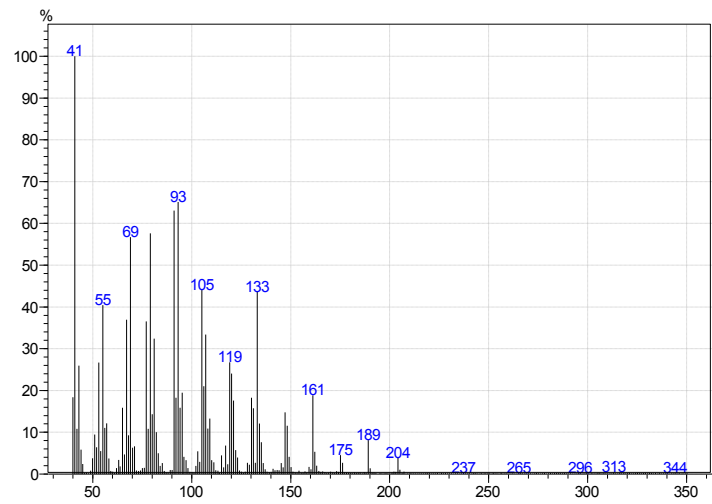

sesquiterpene 3

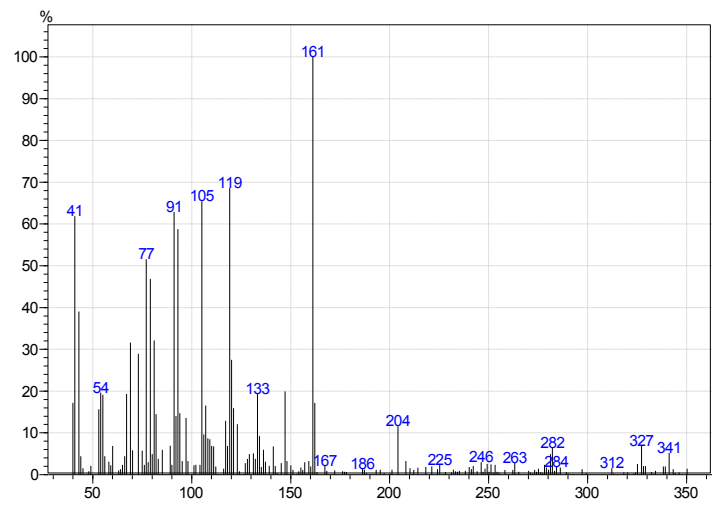

sesquiterpene 4

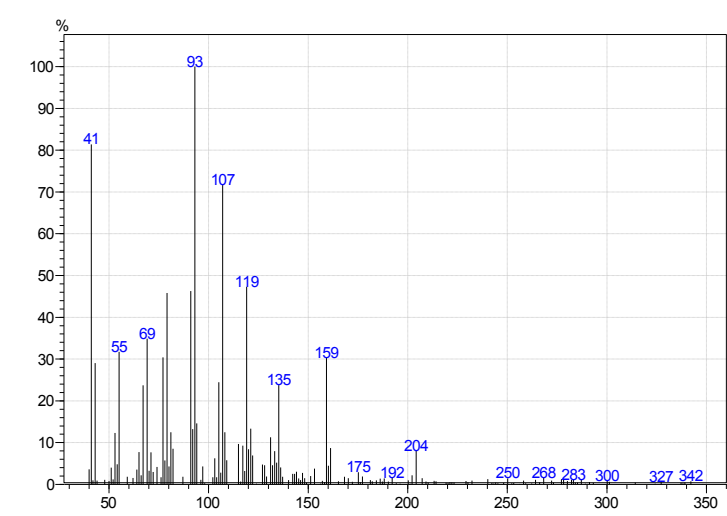

sesquiterpene 5

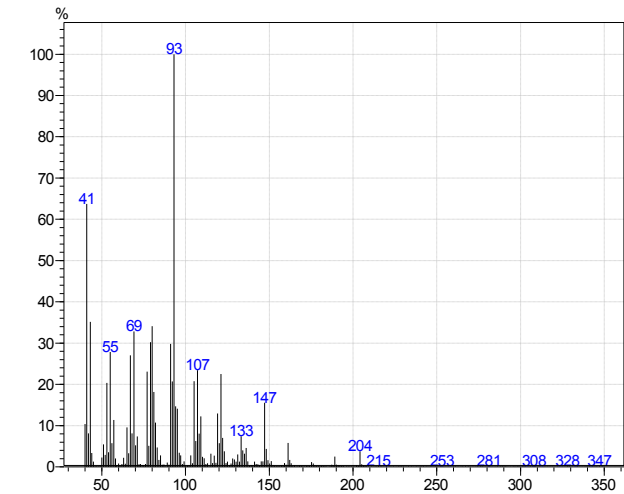

sesquiterpene 6

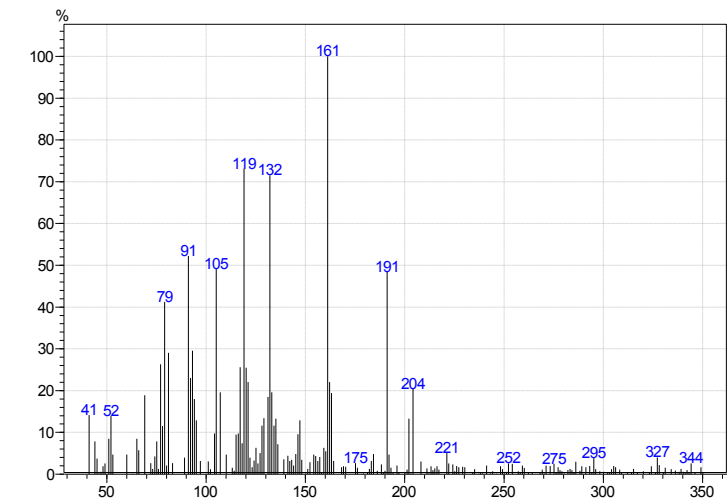



sesquiterpene 7

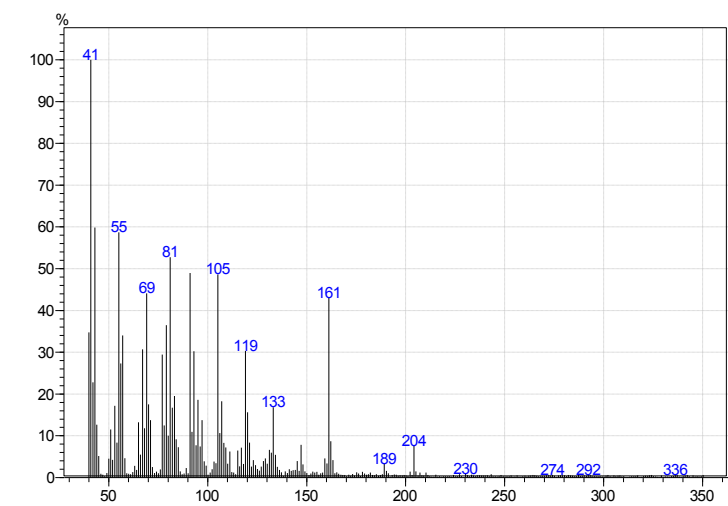

sesquiterpene 8

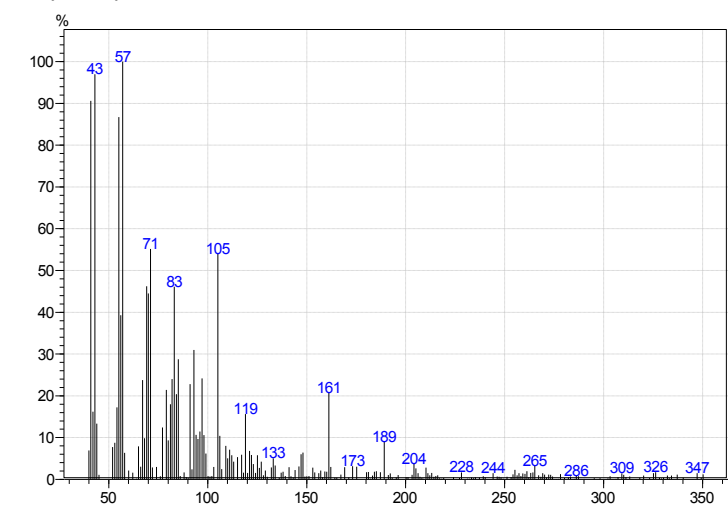

sesquiterpene 9

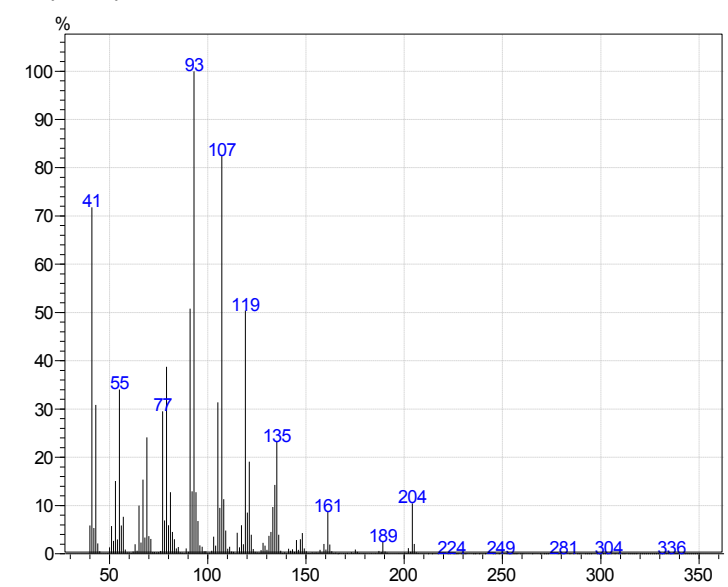

Supplement: MOESM2 [file 49_2018_266_MOESM2_ESM.pdf]
