# Supplementary material for: In search of cues: dung beetle attraction and the significance of volatile composition of dung
Source: Springer Nature journal article supplement (doi:10.1007/s00049-018-0266-4), 2018-10-01
Supplement: MOESM1 [file 49_2018_266_MOESM1_ESM.pdf]

Table S1: Number of collected individuals per species and dung bait.

| Species                         | Cow         | Deer       | Fox       | Horse      | Sheep      | Wild boar   | Sum         |
|---------------------------------|-------------|------------|-----------|------------|------------|-------------|-------------|
| <i>Anoplotrupes stercorosus</i> | 12          | 1          | 1         | 4          | 8          | 12          | 38          |
| <i>Trypocopris vernalis</i>     | 2           | 2          | 2         | 0          | 2          | 2           | 10          |
| <i>Typhaeus typhoeus</i>        | 10          | 1          | 0         | 2          | 2          | 0           | 15          |
| <i>Onthophagus coenobita</i>    | 18          | 3          | 4         | 1          | 1          | 15          | 42          |
| <i>Onthophagus fracticornis</i> | 28          | 2          | 0         | 3          | 37         | 25          | 95          |
| <i>Onthophagus gibbulus</i>     | 0           | 0          | 0         | 0          | 0          | 1           | 1           |
| <i>Onthophagus joannae</i>      | 4           | 0          | 3         | 0          | 7          | 7           | 21          |
| <i>Onthophagus ovatus</i>       | 33          | 46         | 20        | 5          | 105        | 182         | 391         |
| <i>Onthophagus similis</i>      | 10          | 2          | 0         | 1          | 27         | 29          | 69          |
| <i>Aphodius ater</i>            | 8           | 2          | 0         | 5          | 27         | 10          | 52          |
| <i>Aphodius coenosus</i>        | 3           | 4          | 0         | 1          | 8          | 0           | 16          |
| <i>Aphodius corvinus</i>        | 0           | 0          | 0         | 0          | 1          | 0           | 1           |
| <i>Aphodius depressus</i>       | 62          | 3          | 0         | 2          | 8          | 4           | 79          |
| <i>Aphodius distinctus</i>      | 4           | 0          | 0         | 7          | 17         | 10          | 38          |
| <i>Aphodius fimetarius</i>      | 5           | 1          | 0         | 0          | 2          | 1           | 9           |
| <i>Aphodius luridus</i>         | 2           | 0          | 0         | 0          | 4          | 0           | 6           |
| <i>Aphodius prodromus</i>       | 845         | 85         | 22        | 240        | 546        | 919         | 2657        |
| <i>Aphodius pusillus</i>        | 19          | 0          | 0         | 0          | 0          | 0           | 19          |
| <i>Aphodius sphacelatus</i>     | 24          | 2          | 2         | 14         | 27         | 46          | 115         |
| <i>Aphodius sticticus</i>       | 26          | 0          | 0         | 2          | 1          | 6           | 35          |
| <i>Aphodius zenkeri</i>         | 4           | 0          | 0         | 0          | 1          | 0           | 5           |
| <b>Total individuals</b>        | <b>1119</b> | <b>154</b> | <b>54</b> | <b>287</b> | <b>831</b> | <b>1269</b> | <b>3714</b> |
| <b>Total number of species</b>  | <b>19</b>   | <b>13</b>  | <b>7</b>  | <b>13</b>  | <b>19</b>  | <b>15</b>   |             |

Table S2: Number of collected individuals per species and chem bait.

| Species                         | 2-<br>Butanone | Small<br>blend | Large<br>blend | Butyric<br>acid | Indole    | p-Cresol  | Phenol   | Skatole    | Sum         |
|---------------------------------|----------------|----------------|----------------|-----------------|-----------|-----------|----------|------------|-------------|
| <i>Anoplotrupes stercorosus</i> | 0              | 0              | 5              | 2               | 0         | 0         | 0        | 1          | 8           |
| <i>Onthophagus fracticornis</i> | 0              | 0              | 7              | 0               | 1         | 0         | 0        | 2          | 10          |
| <i>Onthophagus ovatus</i>       | 0              | 0              | 3              | 2               | 0         | 0         | 0        | 0          | 5           |
| <i>Onthophagus similis</i>      | 0              | 1              | 5              | 0               | 0         | 0         | 0        | 1          | 7           |
| <i>Aphodius ater</i>            | 0              | 0              | 0              | 0               | 0         | 0         | 0        | 1          | 1           |
| <i>Aphodius coenosus</i>        | 0              | 0              | 0              | 0               | 0         | 0         | 0        | 2          | 2           |
| <i>Aphodius distinctus</i>      | 0              | 0              | 26             | 0               | 0         | 0         | 0        | 8          | 34          |
| <i>Aphodius prodromus</i>       | 0              | 208            | 1336           | 0               | 12        | 25        | 1        | 325        | 1907        |
| <i>Aphodius sphacelatus</i>     | 1              | 4              | 15             | 0               | 1         | 3         | 1        | 3          | 28          |
| <i>Aphodius sticticus</i>       | 0              | 0              | 10             | 0               | 0         | 1         | 0        | 0          | 11          |
| <b>Total individuals</b>        | <b>1</b>       | <b>213</b>     | <b>1407</b>    | <b>4</b>        | <b>14</b> | <b>29</b> | <b>2</b> | <b>343</b> | <b>2013</b> |
| <b>Total number of species</b>  | <b>1</b>       | <b>3</b>       | <b>8</b>       | <b>2</b>        | <b>3</b>  | <b>3</b>  | <b>2</b> | <b>8</b>   |             |
