# Supplementary material for: In search of cues: dung beetle attraction and the significance of volatile composition of dung
Source: Springer Nature journal article supplement (doi:10.1007/s00049-018-0266-4), 2018-10-01
Supplement: MOESM3 [file 49_2018_266_MOESM3_ESM.pdf]

Table S3: Compounds identified in different types of fresh dung. Compounds are listed as percentage.

| Compound                                                      | cow   | deer  | fox   | horse | sheep | wild boar | time (min) | RI   | Literature-RI | authentic standard | MS attached | Literature                                                                                                                                                                                                                                                                                                                                                      |
|---------------------------------------------------------------|-------|-------|-------|-------|-------|-----------|------------|------|---------------|--------------------|-------------|-----------------------------------------------------------------------------------------------------------------------------------------------------------------------------------------------------------------------------------------------------------------------------------------------------------------------------------------------------------------|
| methyl-butyric acid*                                          | -     | -     | -     | -     | 13.4  | 3.81      | 911        | -    | -             | -                  | x           | -                                                                                                                                                                                                                                                                                                                                                               |
| pentanoic acid                                                | -     | 1.29  | -     | -     | -     | 4.25      | 927        | 926  | -             | x                  | -           | Jesussek, M.; Juliano, B.O.; Schieberle, P., Comparison of key aroma compounds in cooked brown rice varieties based on aroma extract dilution analysis, <i>J. Agric. Food Chem.</i> , 2002, 50, 5, 1101-1105.                                                                                                                                                   |
| unknown 1                                                     | -     | -     | 1.79  | -     | -     | 4.43      | 934        | -    | -             | -                  | x           | -                                                                                                                                                                                                                                                                                                                                                               |
| 3,7-dimethyl-octa-1,6-diene (beta-citronellene)               | -     | -     | 3.43  | -     | -     | 4.79      | 947        | 947  | -             | -                  | -           | Buchin, S.; Salmon, J.-C.; Carnat, A.-P.; Berger, T.; Bugaud, C.; Bosset, J.O., Identification de composés monoterpéniques, sesquiterpéniques et benzéniques dans un lait d'alpaga très riche en ces substances, <i>Mitt. Lebensmittelunters. Hyg.</i> , 2002, 93, 199-216.                                                                                     |
| hexanoic acid                                                 | -     | -     | -     | -     | 12.06 | 5.01      | 955        | 956  | -             | x                  | -           | Pino, J.A.; Martot, R., Volatile flavor constituents of acerola ( <i>Malophia emarginata</i> DC.) fruit, <i>J. Agric. Food Chem.</i> , 2001, 49, 12, 5880-5882.                                                                                                                                                                                                 |
| benzaldehyde                                                  | -     | 1.64  | 3.07  | -     | 2.75  | 5.69      | 980        | 978  | x             | -                  | -           | Rout, P.K.; Rao, Y.R.; Sree, A.; Naik, S.N., Composition of essential oil, concrete, absolute, wax and headspace volatiles of <i>Murraya paniculata</i> (Linn.) Jack flowers, <i>Flavour Fragr. J.</i> , 2007, 22, 5, 352-357.                                                                                                                                  |
| methyl-heptane                                                | -     | -     | -     | 2.12  | -     | 0.76      | 5.80       | 985  | -             | -                  | x           | -                                                                                                                                                                                                                                                                                                                                                               |
| 2-octen-1-ol                                                  | -     | 1.7   | 1.79  | -     | -     | 0.69      | 5.99       | 992  | -             | -                  | -           | -                                                                                                                                                                                                                                                                                                                                                               |
| 6-methyl-5-heptene-2-one                                      | -     | 6.24  | -     | 5.97  | 4.37  | -         | 6.09       | 995  | -             | -                  | -           | -                                                                                                                                                                                                                                                                                                                                                               |
| decane                                                        | -     | 6.81  | -     | -     | 2.06  | 6.18      | 999        | 1000 | x             | -                  | -           | -                                                                                                                                                                                                                                                                                                                                                               |
| 2-octanone                                                    | -     | -     | -     | 11.14 | -     | 6.19      | 999        | 999  | -             | -                  | -           | Moio, L.; Pombino, P.; Addéo, F., Odour-impact compounds of Gorgonzola cheese, <i>J. Dairy Res.</i> , 2000, 67, 2, 273-285.                                                                                                                                                                                                                                     |
| phenole                                                       | 8.74  | -     | 26.05 | -     | -     | 6.30      | 1004       | 1004 | -             | -                  | -           | Mijač, S.A.; Meier, S.; Bostov, S., Alkylphenol retention indices, <i>J. Chromatogr. A</i> , 2006, 1123, 1, 98-105.                                                                                                                                                                                                                                             |
| octanal                                                       | -     | -     | -     | 1.84  | 0.53  | 6.55      | 1015       | 1015 | -             | -                  | -           | Bredie, W.L.P.; Mottram, D.S.; Guy, R.C.E., Effect of temperature and pH on the generation of flavor volatiles in extrusion cooking of wheat flour, <i>J. Agric. Food Chem.</i> , 2002, 50, 5, 1118-1125.                                                                                                                                                       |
| unknown 2                                                     | -     | -     | -     | 1.04  | -     | 6.63      | 1018       | -    | -             | x                  | -           | -                                                                                                                                                                                                                                                                                                                                                               |
| cyclohexanemethanol*§                                         | 0.4   | -     | -     | -     | -     | 6.72      | 1022       | -    | -             | x                  | -           | -                                                                                                                                                                                                                                                                                                                                                               |
| dipropyl disulfide*                                           | 0.22  | 1.15  | 0.46  | 1.82  | -     | 6.81      | 1026       | -    | -             | -                  | -           | -                                                                                                                                                                                                                                                                                                                                                               |
| limonene                                                      | -     | 2.28  | -     | 0.66  | -     | 0.41      | 6.99       | 1034 | 1034          | x                  | -           | Moreira, D.L.; Sousa, P.O.; Pereira, N.A.; Cardoso, G.L., Effect of leaf essential oil from Piper solmsianum C.DC. in mice behaviour, <i>An. Acad. Bras. Cienc.</i> , 2001, 73, 1, 1-7.                                                                                                                                                                         |
| unknown 3                                                     | -     | 2.26  | -     | -     | -     | 7.12      | 1040       | -    | -             | -                  | x           | -                                                                                                                                                                                                                                                                                                                                                               |
| monoterpene 1                                                 | -     | 1.86  | -     | -     | -     | 7.68      | 1055       | -    | -             | -                  | x           | -                                                                                                                                                                                                                                                                                                                                                               |
| isophorone                                                    | -     | -     | -     | 0.65  | -     | 7.83      | 1072       | 1074 | -             | -                  | -           | Rowland, C.Y.; Blackman, A.J.; D'Arcy, B.R.; Rintoul, G.B., Comparison of organic extractives found in leatherwood ( <i>Eucryphia lucida</i> ) honey and leatherwood flowers and leaves, <i>J. Agric. Food Chem.</i> , 1995, 43, 3, 753-763.                                                                                                                    |
| methyl cyclohexanoate*§                                       | 0.73  | -     | -     | -     | -     | 7.88      | 1074       | -    | -             | -                  | -           | -                                                                                                                                                                                                                                                                                                                                                               |
| unknown 4                                                     | -     | -     | 1.04  | -     | -     | 8.00      | 1079       | -    | -             | x                  | -           | -                                                                                                                                                                                                                                                                                                                                                               |
| acetophenone                                                  | -     | 4.49  | -     | -     | 5.89  | -         | 8.13       | 1085 | 1096          | x                  | -           | Varlet V.; Knockaert C.; Prost C.; Serot T., Comparison of odor-active volatile compounds of fresh and smoked salmon, <i>J. Agric. Food Chem.</i> , 2006, 54, 9, 3391-3401.                                                                                                                                                                                     |
| monoterpene 2                                                 | -     | -     | -     | 1.1   | -     | 8.27      | 1091       | -    | -             | x                  | -           | -                                                                                                                                                                                                                                                                                                                                                               |
| p-cresol                                                      | 31.68 | 47.28 | 22.68 | 49.96 | 60.64 | 65.2      | 8.44       | 1099 | 1100          | x                  | -           | Caerny, M.; Bruckner, R.; Kirchhoff, E.; Schmitt, R.; Buettner, A., The influence of molecular structure on odor qualities and odor detection thresholds of volatile alkylated phenols, <i>Chem. Senses</i> , 2011, 1-15                                                                                                                                        |
| unknown 5                                                     | -     | 0.71  | -     | -     | 0.62  | -         | 8.71       | 1112 | -             | -                  | x           | -                                                                                                                                                                                                                                                                                                                                                               |
| nonanal                                                       | -     | 3.19  | 0.59  | 21.12 | 2.28  | 1.42      | 8.80       | 1117 | 1118          | -                  | -           | Bredie, W.L.P.; Mottram, D.S.; Guy, R.C.E., Effect of temperature and pH on the generation of flavor volatiles in extrusion cooking of wheat flour, <i>J. Agric. Food Chem.</i> , 2002, 50, 5, 1118-1125.                                                                                                                                                       |
| ethyl cyclohexanoate*§                                        | 0.06  | -     | -     | -     | -     | -         | 9.43       | 1148 | 1146          | -                  | -           | Fan, W.; Qian, M.C., Characterization of Aroma Compounds of Chinese Wuliangye and Jiamanchun Liquors by Aroma Extract Dilution Analysis, <i>J. Agric. Food Chem.</i> , 2006, 54, 7, 2695-2704.                                                                                                                                                                  |
| camphor                                                       | 0.08  | -     | -     | -     | -     | -         | 9.75       | 1164 | 1164          | -                  | -           | Eyles, G.; Dufour, J.-P.; Hallifax, G.; Sotheeswaran, S.; Marriott, P.J., Identification of character-impact odorants in coriander and wild coriander leaves using gas chromatography-olfactometry (GC/O) and comprehensive two-dimensional gas chromatography-time-of-flight mass spectrometry (GC×GC-TOFMS), <i>J. Sep. Sci.</i> , 2005, 28, 9-10, 1061-1074. |
| unknown 6                                                     | -     | 1.09  | -     | -     | 1.67  | -         | 9.89       | 1170 | -             | -                  | x           | -                                                                                                                                                                                                                                                                                                                                                               |
| p-ethylphenol                                                 | 56.92 | -     | -     | -     | -     | -         | 10.32      | 1192 | 1092          | -                  | -           | Jiménez, A.; Aguilera, M.P.; Beltrán, G.; Uceda, M., Application of solid-phase microextraction to virgin olive oil quality control, <i>J. Chromatogr. A</i> , 2006, 1121, 1, 140-144.                                                                                                                                                                          |
| undecanone                                                    | -     | -     | -     | 0.43  | -     | -         | 10.43      | 1197 | -             | -                  | -           | -                                                                                                                                                                                                                                                                                                                                                               |
| dodecane                                                      | -     | -     | -     | 0.92  | -     | -         | 10.53      | 1202 | 1200          | x                  | -           | -                                                                                                                                                                                                                                                                                                                                                               |
| unknown 7                                                     | -     | -     | -     | -     | 0.77  | -         | 10.56      | 1204 | -             | -                  | x           | -                                                                                                                                                                                                                                                                                                                                                               |
| decanal                                                       | -     | -     | -     | 0.86  | 0.74  | -         | 10.86      | 1220 | 1208          | -                  | -           | Alissandrakis E.; Tarantilis P.A.; Harizanis P.C.; Pollisiou M., Comparison of the volatile composition in thyme honeys from several origins in Greece, <i>J. Agric. Food Chem.</i> , 2007, 55, 20, 8152-8157.                                                                                                                                                  |
| beta-cyclocitral                                              | -     | 0.68  | -     | -     | 0.94  | -         | 11.17      | 1236 | 1227          | -                  | -           | Brückner, A.; Stabenheimer, E.; Leis, H.J.; Rasputnig, G. 2015. Chemical basis of unwettability in Liacaridae (Acari, Oribatida): specific variations of a cuticular acid/ester-based system. <i>Exp Appl Acarol</i> 66/3, 313-335                                                                                                                              |
| quinoline                                                     | -     | -     | 3.21  | -     | -     | -         | 11.69      | 1264 | 1242          | x                  | -           | Du, Z.; Cieny, R.; Hammond, C.J., Volatile organic nitrogen-containing constituents in ambrette seed <i>Abelmoschus moschatus</i> Medik. (Malvaceae), <i>J. Agric. Food Chem.</i> , 2008, 56, 16, 7388-7392.                                                                                                                                                    |
| p-propylphenol                                                | 0.31  | -     | -     | -     | -     | -         | 12.12      | 1287 | 1285          | -                  | -           | Caerny, M.; Bruckner, R.; Kirchhoff, E.; Schmitt, R.; Buettner, A., The influence of molecular structure on odor qualities and odor detection thresholds of volatile alkylated phenols, <i>Chem. Senses</i> , 2011, 1-15                                                                                                                                        |
| tridecane                                                     | -     | -     | -     | 1.29  | -     | -         | 12.39      | 1302 | 1300          | x                  | -           | -                                                                                                                                                                                                                                                                                                                                                               |
| 1H-indole                                                     | 0.67  | -     | 41.77 | -     | -     | 1.3       | 12.80      | 1326 | 1328          | x                  | -           | Moio L.; Rillo L.; Ledda A.; Addéo F., Odorous constituents of ovine milk in relationship to diet, <i>J. Dairy Sci.</i> , 1996, 79, 8, 1322-1331.                                                                                                                                                                                                               |
| tetrahydroquinoline (based on MS only, compared to quinoline) | -     | -     | -     | -     | -     | -         | 13.39      | 1360 | -             | -                  | x           | -                                                                                                                                                                                                                                                                                                                                                               |
| unknown 8                                                     | -     | -     | -     | 1.17  | -     | -         | 14.12      | 1401 | -             | -                  | x           | -                                                                                                                                                                                                                                                                                                                                                               |
| tetradecane                                                   | -     | -     | -     | -     | 0.47  | -         | 14.12      | 1402 | 1400          | x                  | -           | -                                                                                                                                                                                                                                                                                                                                                               |
| sesquiterpene 1                                               | -     | -     | -     | 1.25  | -     | -         | 14.16      | 1404 | -             | -                  | x           | -                                                                                                                                                                                                                                                                                                                                                               |
| beta-caryophyllene                                            | -     | 0.18  | -     | 0.37  | -     | -         | 14.31      | 1413 | 1413          | -                  | -           | Silva-Brandão, K.L.; Solferini, V.N.; Trigo, J.R., Chemical and phylogenetic relationships among <i>Aristolochia</i> L. (Aristolochiaceae) from southeastern Brazil, <i>Biochem. Syst. Ecol.</i> , 2006, 34, 4, 291-302.                                                                                                                                        |
| skatole                                                       | 0.19  | 0.51  | -     | -     | 2.1   | 14.39     | 1418       | 1420 | x             | -                  | -           | Young, O.A.; Lane, G.A.; Priolo, A.; Fraser, K., Pastoral and species flavour in lambs raised on pasture, lucerne or maize, <i>J. Sci. Food Agric.</i> , 2003, 83, 2, 93-104.                                                                                                                                                                                   |
| sesquiterpene 2                                               | -     | 13.02 | -     | 1.51  | 2.1   | -         | 14.57      | 1429 | -             | -                  | x           | -                                                                                                                                                                                                                                                                                                                                                               |
| sesquiterpene 3                                               | -     | -     | -     | 0.14  | -     | -         | 14.77      | 1441 | -             | -                  | x           | -                                                                                                                                                                                                                                                                                                                                                               |
| sesquiterpene 4                                               | -     | -     | -     | 1.35  | 0.48  | 0.04      | 15.07      | 1459 | -             | -                  | x           | -                                                                                                                                                                                                                                                                                                                                                               |
| sesquiterpene 5                                               | -     | 1.66  | -     | -     | 0.18  | -         | 15.19      | 1467 | -             | -                  | x           | -                                                                                                                                                                                                                                                                                                                                                               |
| sesquiterpene 6                                               | -     | -     | -     | -     | -     | 0.04      | 15.55      | 1489 | -             | -                  | x           | -                                                                                                                                                                                                                                                                                                                                                               |
| sesquiterpene 7                                               | -     | -     | -     | 0.43  | 0.17  | -         | 15.63      | 1493 | -             | -                  | x           | -                                                                                                                                                                                                                                                                                                                                                               |
| sesquiterpene 8                                               | -     | -     | -     | 1.33  | 0.38  | -         | 15.75      | 1501 | -             | -                  | x           | -                                                                                                                                                                                                                                                                                                                                                               |
| sesquiterpene 9                                               | -     | 1.96  | -     | -     | 0.82  | -         | 16.29      | 1536 | -             | -                  | x           | -                                                                                                                                                                                                                                                                                                                                                               |

\*tentatively assigned based on library hit only  
§ possibly contaminants from plastic bags
